# Supplementary material
Source: publisher figshare collection journal article supplement (https://tandf.figshare.com/ndownloader/files/22361316)
Supplement: Supplementary file 1 [file 22361316]

eSupplement

Definitions in the analysis

Acute respiratory infection: included diagnoses (ICD-10 codes)

- acute upper respiratory infections of multiple and unspecified sites (J06),
- acute bronchitis (J20 excl. J20.0, J20.1, and J20.2),
- bronchitis, not specified as acute or chronic (J40),
- acute sinusitis (J01),
- cough (R05),
- acute nasopharyngitis (J00),
- viral infection of unspecified site (B34),
- acute pharyngitis (J02 excl. J02.0),
- acute laryngitis and tracheitis (J04),
- unspecified acute lower respiratory infection (J22)

Bacterial infection: included diagnoses (ICD-10 codes)

- A38,
- J02.0,
- J03.0,
- J13-J15,
- J16.0,
- J20.0,
- J20.1,
- J20.2,
- B95,
- B96
